# Supplementary material for: Water Regime Influences Bulk Soil and Rhizosphere of Cereus jamacaru Bacterial Communities in the Brazilian Caatinga Biome
Source: PLoS One. 2013 Sep 17;8(9):e73606. doi: 10.1371/journal.pone.0073606 (PMC3775785; doi:10.1371/journal.pone.0073606)
Supplement: Table S1 — Soil chemical features of each site for both seasons. Values are presented as the average ± standard errors (n = 3). In each line, values followed by the same letters do not differ statistically according to Tukey’s test at 5%. (DOCX) [file pone.0073606.s004.docx]

|  | **Rainy season** | | | | | **Dry season** | | | | |
| --- | --- | --- | --- | --- | --- | --- | --- | --- | --- | --- |
| **Sites** | #1 | #2 | #3 | #4 | #5 | #1 | #2 | #3 | #4 | #5 |
| **OM** | 24.50±0.29de | 20.50±0.29f | 24.00±0.00de | 24.50±0.29de | 37.00±0.00b | 23.00±0.00def | 22.00±0.00ef | 43.00±1.73a | 33.50±0.29c | 25.50±0.29d |
| **pH** | 5.80±0.00c | 4.15±0.03f | 6.20±0.00b | 5.25±0.03e | 5.65±0.03d | 5.60±0.00d | 4.20±0.00f | 5.65±0.03d | 5.30±0.00e | 6.30±0.00a |
| **P** | 5.00±0.00c | 15.00±0.58c | 3.00±0.00c | 3.50±0.29c | 49.50±10.10a | 6.00±0.00c | 9.00±0.00c | 15.50±0.29bc | 6.50±0.29c | 31.50±0.87b |
| **K** | 2.55±0.03e | 0.70±0.00g | 1.40±0.00f | 3.60±0.12d | 6.40±0.23b | 2.30±0.06e | 1.50±0.00f | 4.60±0.29c | 8.25±0.03a | 4.65±0.03c |
| **Ca** | 31.50±0.29de | 4.50±0.29g | 39.00±0.00cd | 19.50±1.44f | 50.50±3.18b | 23.00±0.58ef | 8.50±0.29g | 64.00±4.04a | 23.50±0.29ef | 46.50±0.29bc |
| **Mg** | 6.00±0.00e | 1.00±0.00f | 24.00±0.00b | 6.00±0.58e | 12.00±0.58c | 5.00±0.00e | 1.50±0.29f | 37.50±0.29a | 8.00±0.00d | 13.00±0.00c |
| **H+Al** | 17.00±0.58fg | 32.50±0.87b | 15.00±0.00g | 22.00±0.00e | 23.50±0.87de | 19.00±0.58f | 36.00±1.15a | 25.00±0.00d | 28.00±0.00c | 15.00±0.00g |
| **S.B.** | 39.45±0.20c | 6.50±0.06d | 63.90±0.00b | 29.30±2.02c | 69.15±4.19b | 30.10±0.35c | 11.45±0.20d | 106.70±4.79a | 39.65±0.14c | 63.90±0.23b |
| **CEC** | 56.75±0.32de | 39.05±0.95f | 78.70±0.00c | 51.80±2.02e | 92.90±4.91b | 49.35±0.95ef | 47.65±0.89ef | 131.70±4.79a | 67.40±0.17cd | 78.65±0.26c |
| **V%** | 69.50±0.87c | 17.00±0.58g | 81.00±0.00a | 56.00±1.73e | 74.00±0.58b | 61.00±0.58f | 24.50±0.87f | 81.00±0.58a | 59.00±0.00de | 81.00±0.00a |
| **B** | 0.32±0.00ab | 0.23±0.00de | 0.18±0.00fg | 0.16±0.01g | 0.24±0.00de | 0.36±0.00a | 0.35±0.00a | 0.29±0.03bc | 0.26±0.00cd | 0.21±0.01ef |
| **Cu** | 0.60±0.00c | 0.25±0.03cd | 1.00±0.00b | 0.20±0.00d | 0.50±0.06cd | 0.50±0.00cd | 0.30±0.00cd | 2.90±0.23a | 0.40±0.00cd | 0.40±0.00cd |
| **Fe** | 12.00±0.00f | 125.00±10.97a | 76.00±0.00b | 67.00±0.58bc | 50.00±2.31cd | 16.50±0.29f | 84.00±5.77b | 68.00±6.35bc | 44.00±2.89de | 23.00±0.00ef |
| **Mn** | 21.00±0.29e | 3.20±0.06g | 51.00±0.00b | 18.55±0.66e | 41.45±3.44c | 65.55±1.24a | 12.40±0.00f | 53.40±0.17b | 52.45±0.20b | 32.40±0.00d |
| **Zn** | 0.70±0.00d | 4.85±0.66c | 12.30±0.00a | 3.75±0.09c | 7.25±0.49b | 1.05±0.03d | 0.75±0.03d | 1.95±0.26d | 1.20±0.00d | 1.05±0.03d |
